# Supplementary material
Source: publisher figshare collection journal article supplement (https://karger.figshare.com/ndownloader/files/38249631)
Supplement: Supplementary file 1 [file 38249631]

**Supplement Table 2:　 The response rate to chemotherapy in the FAS**

|  | Treatment group | |  | Response rate | | | | |  | ORR (%) |
| --- | --- | --- | --- | --- | --- | --- | --- | --- | --- | --- |
| Timepoints |  | n |  | CR | PR (%) | PD (%) | SD (%) | ORR (%) |  | Odds ratio [95%CI] |
| Course 2 | SPP-003 | 15 |  | 0 | 6 (40.0) | 2 (13.3) | 7 (46.7) | 6 (40.0) |  | 0.9524  [0.2315, 3.9174] |
|  | Placebo | 17 |  | 0 | 7 (41.2) | 1 (5.9) | 9 (52.9) | 7 (41.2) |  |
| Course 4 | SPP-003 | 12 |  | 0 | 7 (58.3) | 0 | 5 (41.7) | 7 (58.3) |  | 0.3818  [0.0686, 2.1251] |
|  | Placebo | 14 |  | 0 | 11 (78.6) | 0 | 3 (21.4) | 11 (78.6) |  |
| Three weeks after the completion of administration | SPP-003 | 14 |  | 0 | 8 (57.1) | 3 (21.4) | 3 (21.4) | 8 (57.1) |  | 0.8485  [0.2049, 3.5128] |
| Placebo | 18 |  | 0 | 11 (61.1) | 4 (22.2) | 3 (16.7) | 11 (61.1) |  |

Note: ORR is defined as CR + PR rate.

Abbreviations: CR = Complete Response, ORR = Overall Response Rate, PD = Progressive Disease, PR = Partial Response, SD = Stable Disease.
